# Supplementary material for: Neutralization of SARS-CoV-2 BQ.1.1 and XBB.1.5 by Breakthrough Infection Sera from Previous and Current Waves in China
Source: bioRxiv or medRxiv preprint supplement (doi:10.1101/2023.02.07.527406), 2023-02-18
Supplement: Supplementary file [file media-1.pdf]

## Supplementary Information

### Neutralization of SARS-CoV-2 BQ.1.1 and XBB.1.5 by Breakthrough Infection Sera from Previous and Current Waves in China

Xun Wang<sup>1,2,#</sup>, Shuai Jiang<sup>1,3,#</sup>, Shujun Jiang<sup>4,5,#</sup>, Xiangnan Li<sup>6,#</sup>, Jingwen Ai<sup>2,7,#</sup>, Ke Lin<sup>2,7,#</sup>, Shiyun Lv<sup>8,#</sup>, Shixuan Zhang<sup>6,#</sup>, Minghui Li<sup>1,#</sup>, Xinyi He<sup>6</sup>, Dingding Li<sup>4,5</sup>, Chen Li<sup>1</sup>, Chaoyue Zhao<sup>1</sup>, Xiaoyu Zhao<sup>1</sup>, Rui Qiao<sup>1</sup>, Yuchen Cui<sup>1</sup>, Yanjia Chen<sup>1</sup>, Jiayan Li<sup>1</sup>, Guonan Cai<sup>1</sup>, Jixi Li<sup>8,\*</sup>, Lili Dai<sup>8,\*</sup>, Zixin Hu<sup>6,10,\*</sup>, Wenhong Zhang<sup>2,7,11,\*</sup>, Yanliang Zhang<sup>4,5,\*</sup>, Pengfei Wang<sup>1,2,\*</sup>

<sup>1</sup>Shanghai Pudong Hospital, Fudan University Pudong Medical Center, Shanghai Institute of Infectious Disease and Biosecurity, State Key Laboratory of Genetic Engineering, MOE Engineering Research Center of Gene Technology, School of Life Sciences, Fudan University, Shanghai, China

<sup>2</sup>Shanghai Huashen Institute of Microbes and Infections, Shanghai, China

<sup>3</sup>Department of General Surgery, Shanghai Pudong Hospital, Fudan University Pudong Medical Center, Shanghai Key Laboratory of Vascular Lesions Regulation and Remodeling, Shanghai, China.

<sup>4</sup>Department of Infectious Diseases, Nanjing Hospital of Chinese Medicine Affiliated to Nanjing University of Chinese Medicine, Nanjing, Jiangsu, China

<sup>5</sup>Nanjing Research Center for Infectious Diseases of Integrated Traditional Chinese and Western Medicine, Nanjing, Jiangsu, China

<sup>6</sup>State Key Laboratory of Genetic Engineering, Collaborative Innovation Center for Genetics and Development, School of Life Sciences and Human Phenome Institute, Zhangjiang Fudan International Innovation Center, Fudan University, Shanghai, China

<sup>7</sup>Department of Infectious Diseases, Shanghai Key Laboratory of Infectious Diseases and Biosafety Emergency Response, National Medical Center for Infectious Diseases, Huashan Hospital, Fudan University, Shanghai, China

<sup>8</sup>Center for Infectious Diseases, Beijing Youan Hospital, Capital Medical University, Beijing, China

<sup>9</sup>State Key Laboratory of Genetic Engineering, School of Life Sciences and Huashan Hospital, MOE Engineering Research Center of Gene Technology, Shanghai Engineering Research Center of Industrial Microorganisms, Fudan University, Shanghai, China

<sup>10</sup>Artificial Intelligence Innovation and Incubation Institute, Fudan University, Shanghai, China

<sup>11</sup>National Clinical Research Center for Aging and Medicine, Huashan Hospital, Fudan University, Shanghai, China

#These authors contributed equally

\*Address correspondence to Pengfei Wang ([pengfei\\_wang@fudan.edu.cn](mailto:pengfei_wang@fudan.edu.cn)), Yanliang Zhang ([fsyy00404@njucm.edu.cn](mailto:fsyy00404@njucm.edu.cn)), Wenhong Zhang ([zhangwenhong@fudan.edu.cn](mailto:zhangwenhong@fudan.edu.cn)), Zixin Hu ([huzixin@fudan.edu.cn](mailto:huzixin@fudan.edu.cn)), Lili Dai ([lilydaier@ccmu.edu.cn](mailto:lilydaier@ccmu.edu.cn)) or Jixi Li ([lijixi@fudan.edu.cn](mailto:lijixi@fudan.edu.cn)).

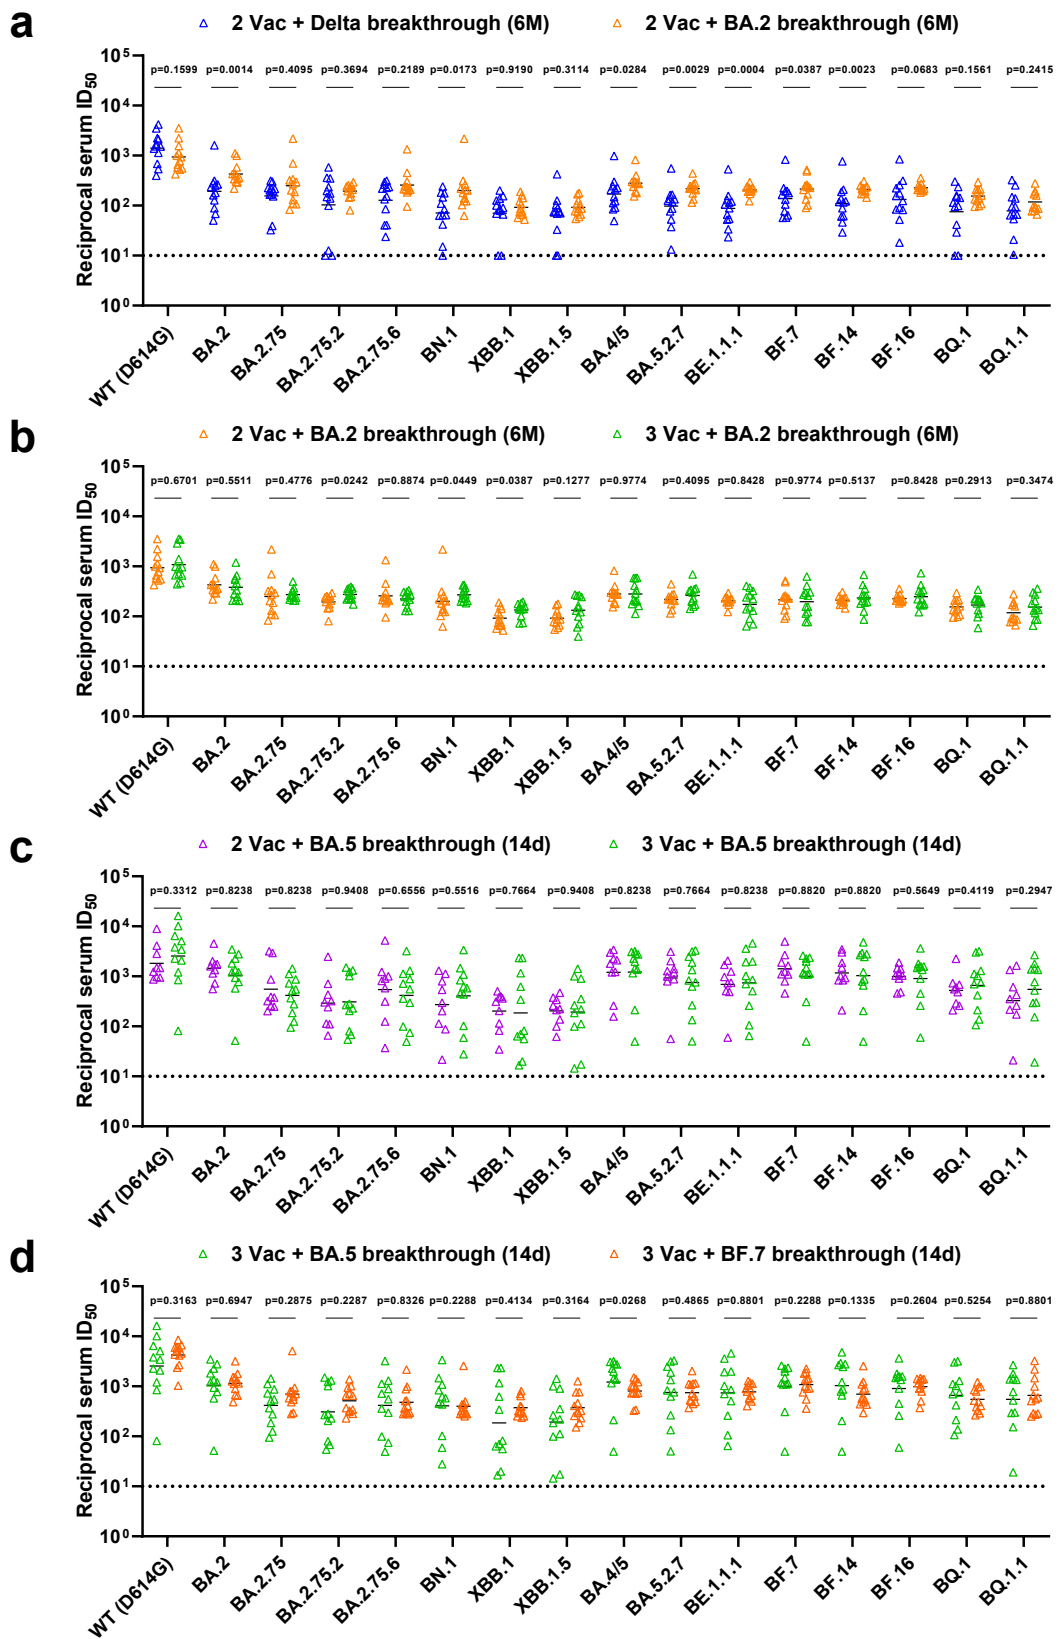

Supplementary Fig. S1. In parallel comparison of serum neutralization titers against distinct SARS-CoV-2 variants. (a) Neutralization titers of sera collected at month 6 from individuals with

Delta breakthrough infection versus those with BA.2 breakthrough infection after 2 doses of inactivated vaccinations. (b) Neutralization titers of sera collected at month 6 from individuals with BA.2 breakthrough infection after 2 doses versus those after 3 doses of inactivated vaccinations. (c) Neutralization titers of sera collected at day 14 from individuals with BA.5 breakthrough infection after 2 doses versus those after 3 doses of inactivated vaccinations. (d) Neutralization titers of sera collected at day 14 from individuals with BA.5 breakthrough infection versus those with BF.7 breakthrough infection after 3 doses of inactivated vaccinations. *P* values were determined by multiple Mann-Whitney tests.

**Supplementary Table S1. Baseline characteristics of enrolled participants**

|                                                                                                 | 3 ×<br>CoronaVac<br>(n=11) | 2 ×<br>CoronaVac +<br>ZF2001<br>(n=11) | 2 × Vac +<br>Delta<br>breakthrough<br>(n=12) | 2 × Vac +<br>BA.2<br>breakthrough<br>(n=12) | 3 × Vac +<br>BA.2<br>breakthrough<br>(n=12) | 2 × Vac +<br>BA.5<br>breakthrough<br>(n=9) | 3 × Vac +<br>BA.5<br>breakthrough<br>(n=11) | 3 × Vac +<br>BF.7<br>breakthrough<br>(n=12) |
|-------------------------------------------------------------------------------------------------|----------------------------|----------------------------------------|----------------------------------------------|---------------------------------------------|---------------------------------------------|--------------------------------------------|---------------------------------------------|---------------------------------------------|
| Age(years),<br>median (range)                                                                   | 44.3(28-63)                | 39.7(20-53)                            | 47(35-55)                                    | 43(25-66)                                   | 37(32-66)                                   | 30.8(23-47)                                | 30.6(22-47)                                 | 40.1 (34-50)                                |
| Male, n (%)                                                                                     | 7(63.6%)                   | 3(27.2%)                               | 5(41.6%)                                     | 9 (75.0%)                                   | 8(66.7%)                                    | 6(66.6%)                                   | 5(45.5%)                                    | 4(33.3%)                                    |
| BMI (kg/m <sup>2</sup> ),<br>mean (SD)                                                          | 24.7(3.1)                  | 23.9(3.7)                              | 29(10.7)                                     | 25.1(2.6)                                   | 25.2(3.2)                                   | 24(3.2)                                    | 20.9(2.2)                                   | 23.9(3.3)                                   |
| Breakthrough<br>infections days<br>after the last<br>Coronavirus<br>vaccines, median<br>(range) | N/A                        | N/A                                    | 76.4 (34-<br>128)                            | ND                                          | ND                                          | 458.3 (325-<br>587)                        | 313.5 (220-<br>387)                         | 407.4 (363-<br>432)                         |
| Serum samples<br>collection days<br>after the<br>vaccination or<br>infection, median<br>(range) | 17.5 (15-<br>22)           | 18 (18)                                | 156.6 (153-<br>161)                          | 180(164-<br>202)                            | 176(167-<br>196)                            | 25.2 (21-<br>34)                           | 21.9 (18-<br>24)                            | 14.1 (10-<br>19)                            |
| Comorbidities<br>(%)                                                                            |                            |                                        |                                              |                                             |                                             |                                            |                                             |                                             |
| Any, n (%)                                                                                      | 0(0%)                      | 0(0%)                                  | 2(16.6%)                                     | 3(25%)                                      | 0(0%)                                       | 0(0%)                                      | 0(0%)                                       | 0(0%)                                       |
| HTN, n (%)                                                                                      | 0(0%)                      | 0(0%)                                  | 2(16.6%)                                     | 3(25%)                                      | 0(0%)                                       | 0(0%)                                      | 0(0%)                                       | 0(0%)                                       |
| CAD, n (%)                                                                                      | 0(0%)                      | 0(0%)                                  | 0(0%)                                        | 0(0%)                                       | 0(0%)                                       | 0(0%)                                      | 0(0%)                                       | 0(0%)                                       |
| DM, n (%)                                                                                       | 0(0%)                      | 0(0%)                                  | 0(0%)                                        | 0(0%)                                       | 0(0%)                                       | 0(0%)                                      | 0(0%)                                       | 0(0%)                                       |
| NASH, n (%)                                                                                     | 0(0%)                      | 0(0%)                                  | 0(0%)                                        | 0(0%)                                       | 0(0%)                                       | 0(0%)                                      | 0(0%)                                       | 0(0%)                                       |
| Arrhy, n (%)                                                                                    | 0(0%)                      | 0(0%)                                  | 0(0%)                                        | 0(0%)                                       | 0(0%)                                       | 0(0%)                                      | 0(0%)                                       | 0(0%)                                       |
| Asthma, n (%)                                                                                   | 0(0%)                      | 0(0%)                                  | 0(0%)                                        | 0(0%)                                       | 0(0%)                                       | 0(0%)                                      | 0(0%)                                       | 0(0%)                                       |
| Rhinitis, n (%)                                                                                 | 0(0%)                      | 0(0%)                                  | 0(0%)                                        | 0(0%)                                       | 0(0%)                                       | 0(0%)                                      | 0(0%)                                       | 0(0%)                                       |
| Urticaria, n (%)                                                                                | 0(0%)                      | 0(0%)                                  | 0(0%)                                        | 0(0%)                                       | 0(0%)                                       | 0(0%)                                      | 0(0%)                                       | 0(0%)                                       |

N/A, not applicable. ND, no data. BMI, body mass index. CAD, coronary artery disease. HTN, hypertension. DM, diabetes mellitus. Arrhy, arrhythmia, NASH, non-alcoholic steatohepatitis.
